# Supplementary material
Source: Atypon-hosted journal article supplement (https://cornous.com/downloadsupplementory/172)
Supplement: 172 [file 172]

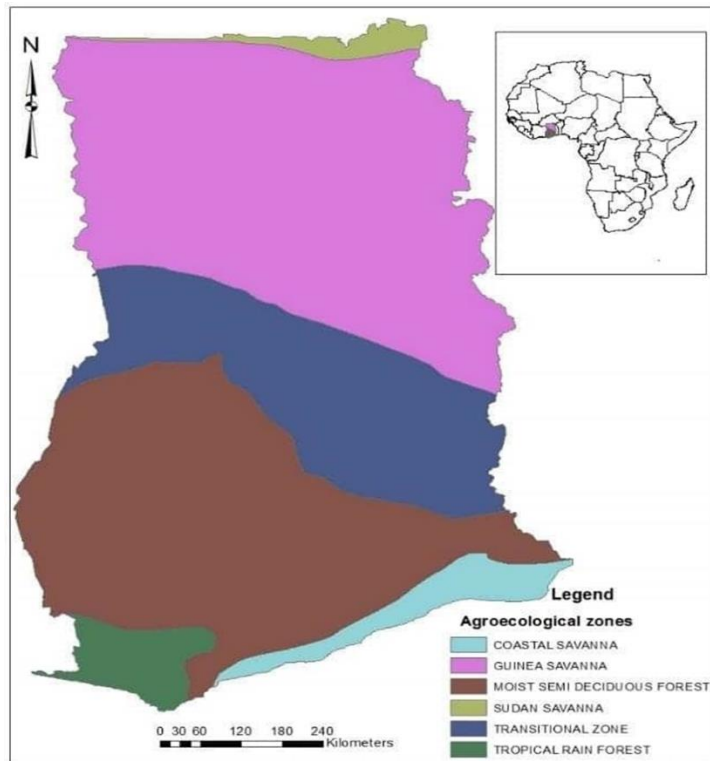

**Figure 1: A map depicting the study areas**

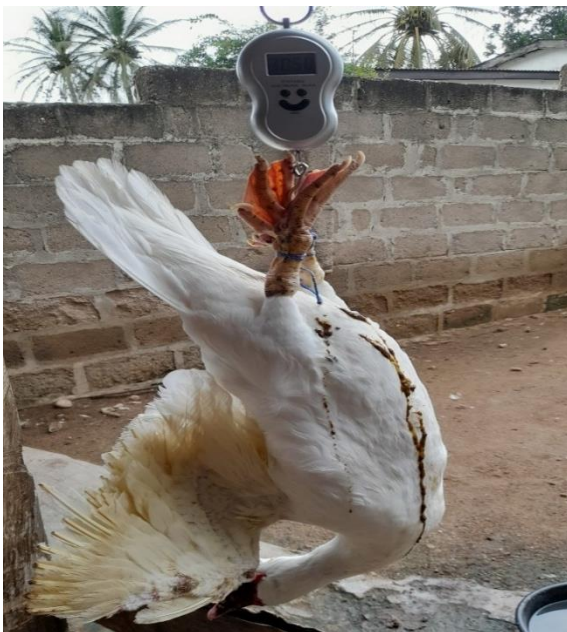

**Figure 2: Demonstration of measurement of body weight**

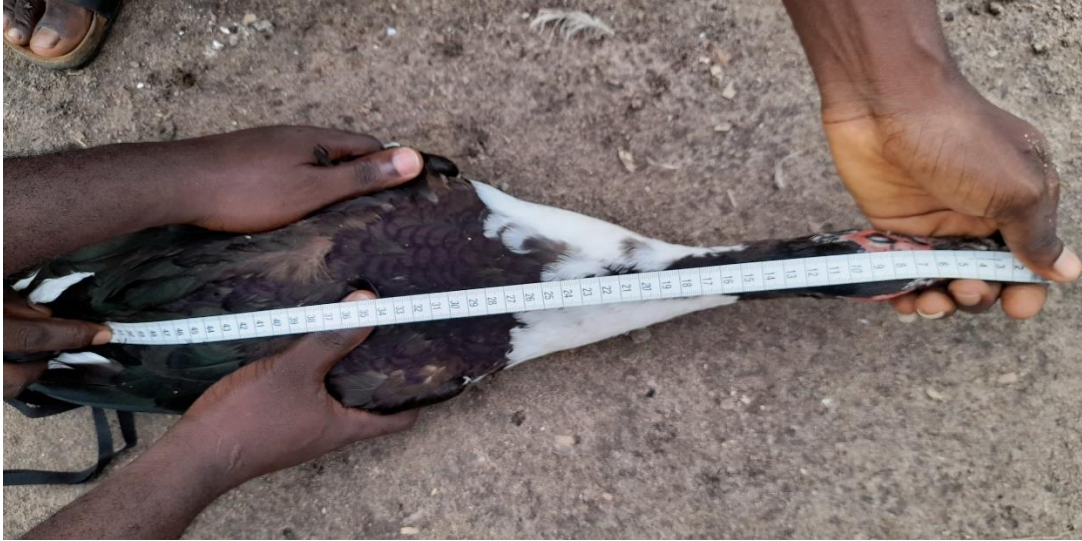

**Figure 3: Demonstration of measurement of body length**

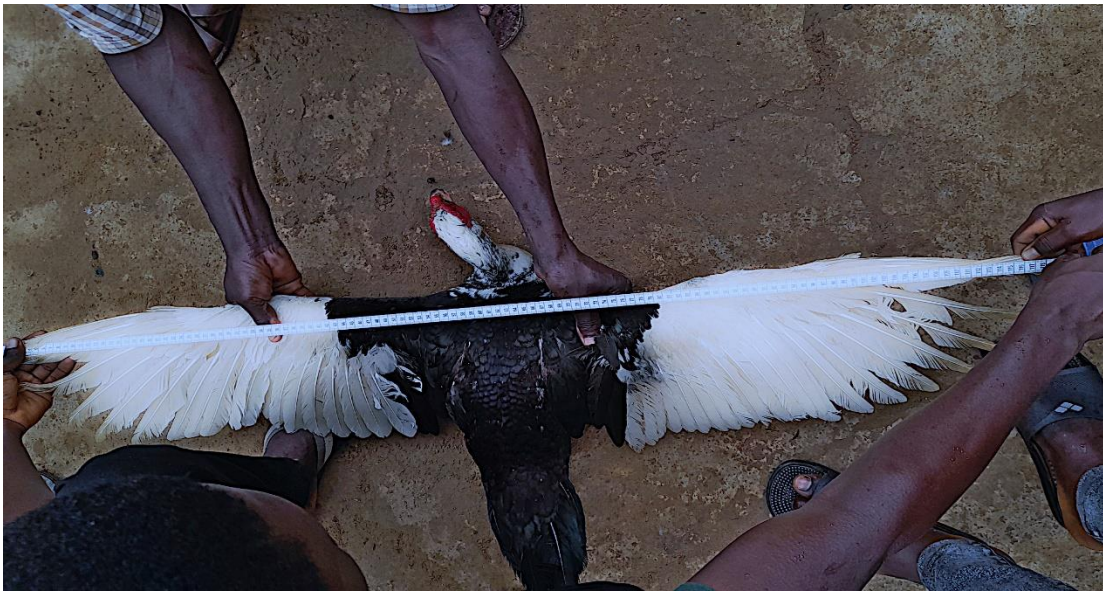

**Figure 4: Demonstration of measurement of wing span**

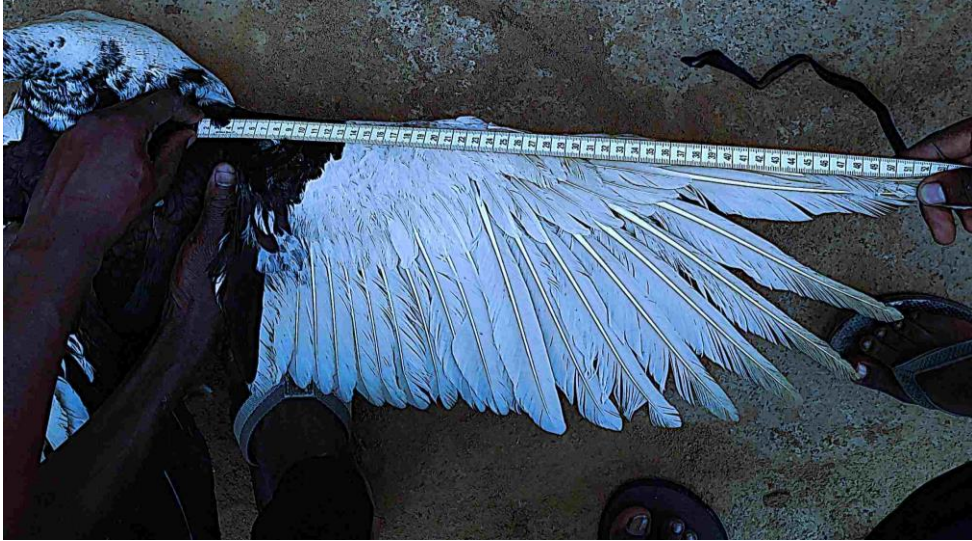

**Figure 5: Demonstration of measurement of wing length**

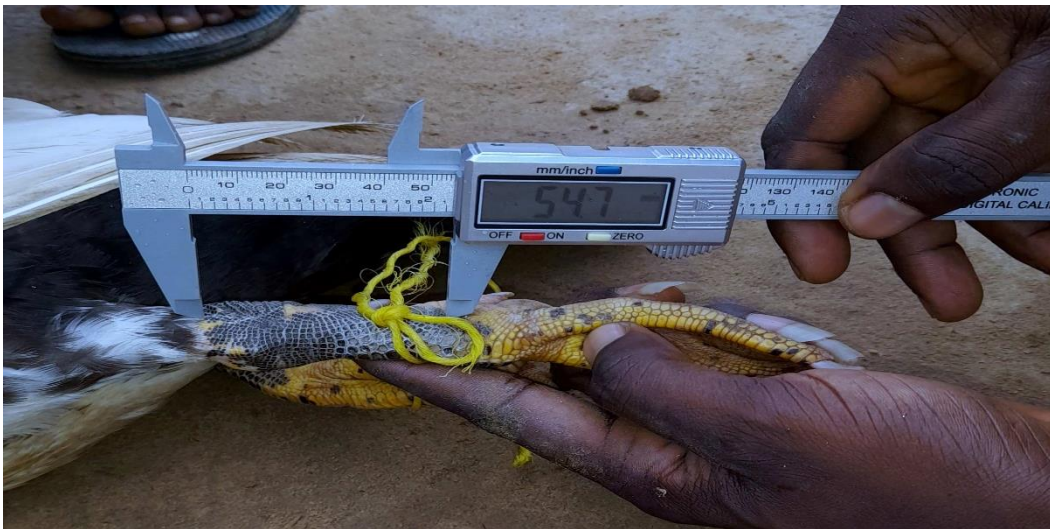

**Figure 6: Demonstration of measurement of shank length**

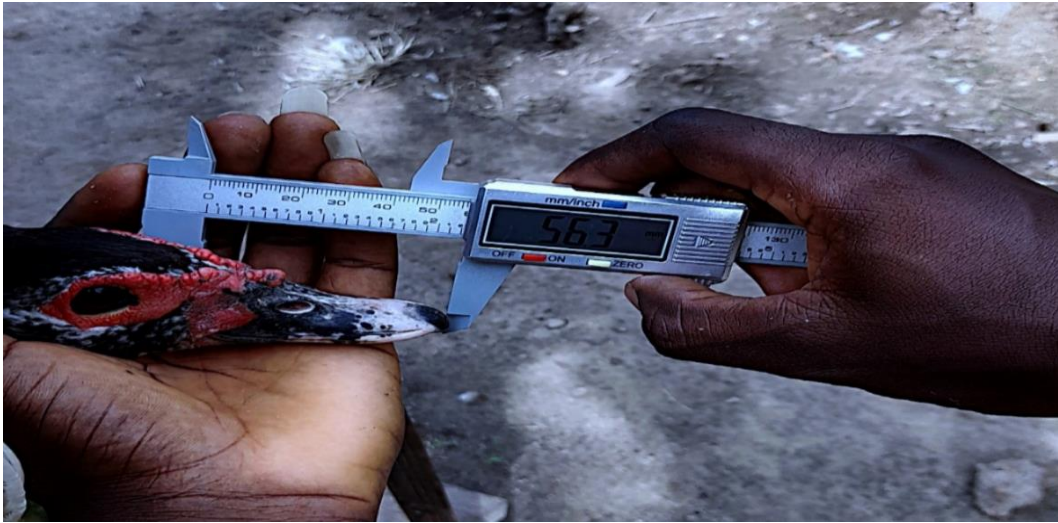

**Figure 7: Demonstration of measurement of bill length**

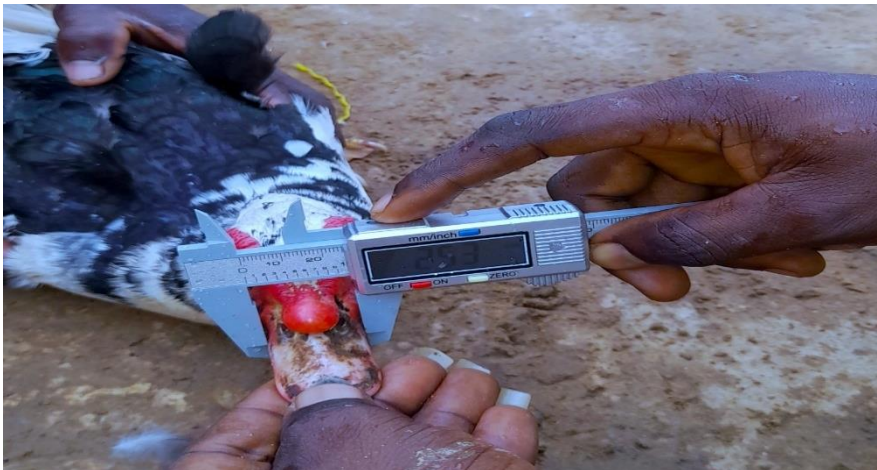

**Figure 8: Demonstration of measurement of bill width**

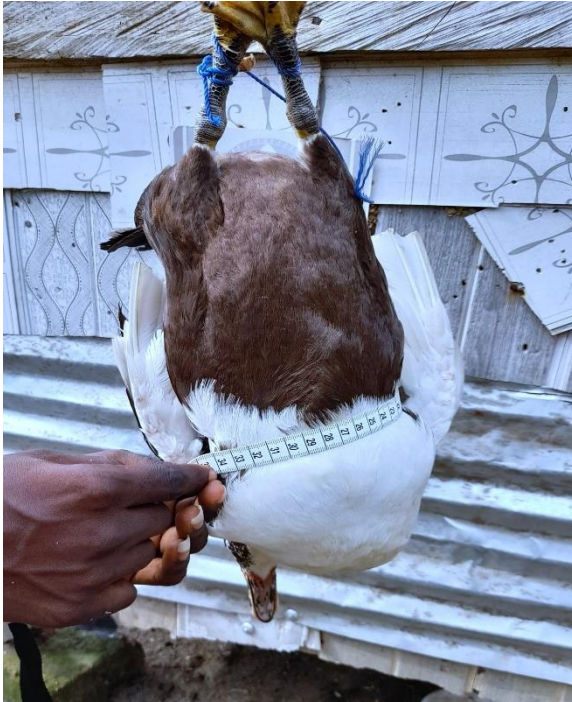

**Figure 9: Demonstration of measurement of breast circumference**

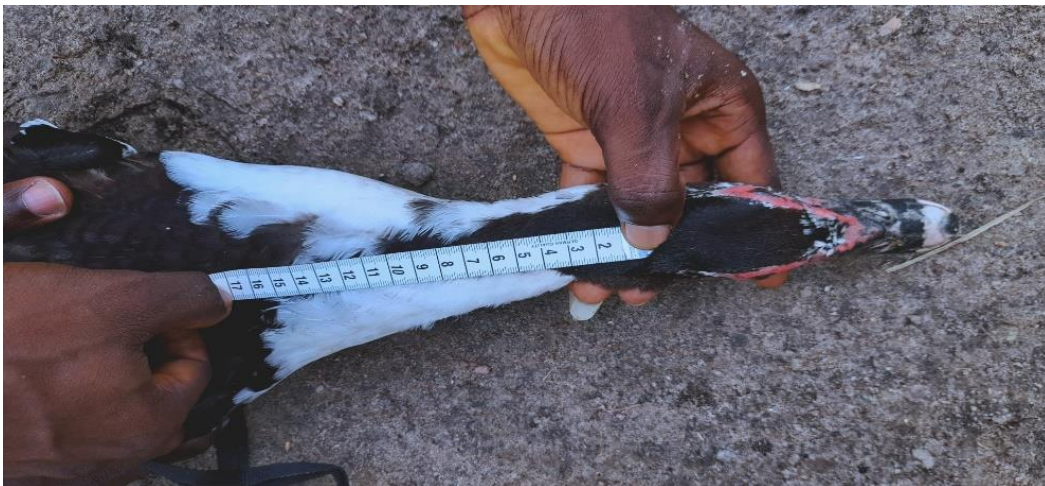

**Figure 10: Demonstration of measurement of neck length**
